# Supplementary figures and images for: Sustainability driven additive manufacturing: repetitive mechanical recycling response evaluation to valorize polycarbonate scrap
Source: Royal Society of Chemistry journal article supplement (doi:10.1039/d5va00048c), 2025-01-01

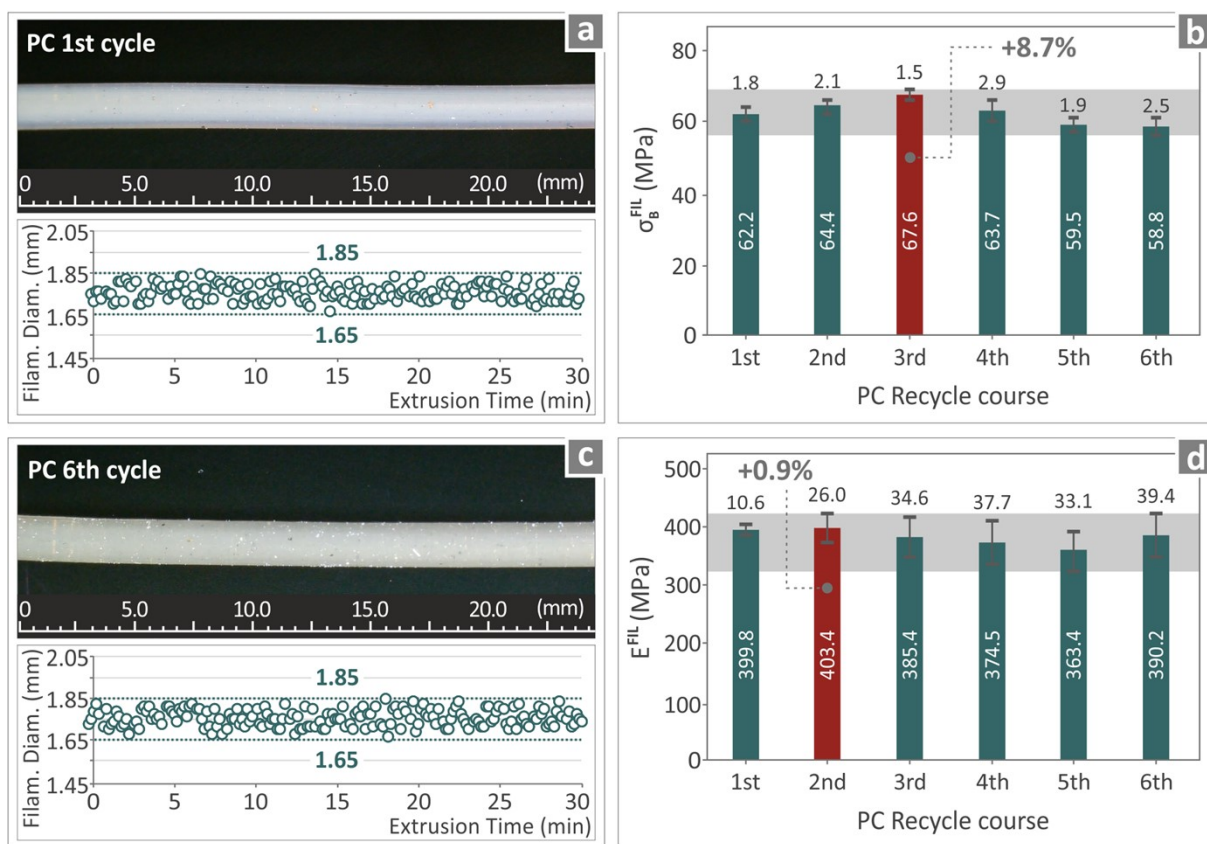

Supplemental 1

Supplement: d5va00048c2.pdf [file d5va00048c2.pdf]
